# Supplementary material
Source: PubMed Central journal article supplement (PMC3779758)
Supplement: supp_M113.485482_jbc.M113.485482-1.pdf [file supp_M113.485482_jbc.M113.485482-1.pdf]

## LEGENDS TO SUPPLEMENTAL FIGURES

**Figure S1: Visualization, after epon-embedding, of filamentous structures around the nucleus.** Control non-transfected HeLa cell (A), pCDNA3.1/endoB2 transfected cell (B, C). Note in panel (B) the accumulation of electron-dense structures partly surrounding the nucleus (arrowheads) and their absence in the control cell. The region delimited with a white box is magnified in (C) to highlight the high density of the filamentous network and corresponds to a larger field of the view shown in Fig. 1B, panel f.

**Figure S2: EndoB2-St affinity-purified proteins from HeLa/endoB2-St cell lysates identified by mass spectrometry.** (A) Partial list of proteins selected for the highest score and highest number of matching peptides and identified in two independent samples from HeLa/endoB2-St cell lysates. Note that endogenous endophilin B1, a molecular partner of endoB2 is present in the material retained on the affinity matrix. (B) Partial sequence coverage by peptides identified in human plectin. Six peptides (1-9, 129-138, 301-307, 301-316, 326-336, and 350-387) are underlined on the aligned sequences of the 9 human plectin isoforms (up to aminoacid positions 245-414). Identified peptides specific for plectin isoform 1 (gene name PLEC1) at the N-terminal sequence of the protein are highlighted in pink. Other peptides are shown in red. In the N-terminal region of plectin 1 (residues 1-174) (with no homology in the nine isoforms), only pink stretches 1-9 and 129-138 were detected.

**Figure S3: Plectin siRNA interference and incidence on the vimentin network.** HeLa/endoB2-St cells were transfected with control or plectin-1 siRNAs for 72h. Cells were processed for immunofluorescence using the indicated antibodies and images from z-sections were taken using a 20x objective to visualize large fields. Note in the top right panel the heterogeneity of plectin expression with, as in Fig. 8A, the presence of cells expressing plectin at the detection limit. The 3 images of the bottom panels (anti-vimentin) obtained from cells treated with si plectin-1 illustrate the bundling of vimentin filaments whose length generally exceeds the longest nucleus axis (for measurements, nuclei were stained with dapi (not shown)). Scale bar: 20  $\mu$ m.

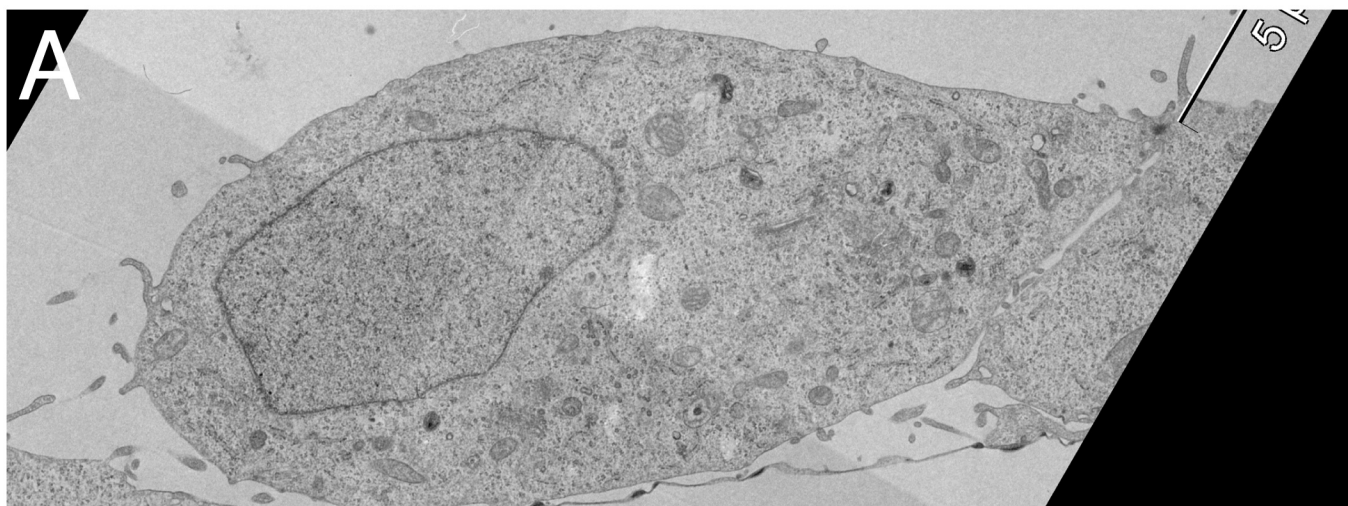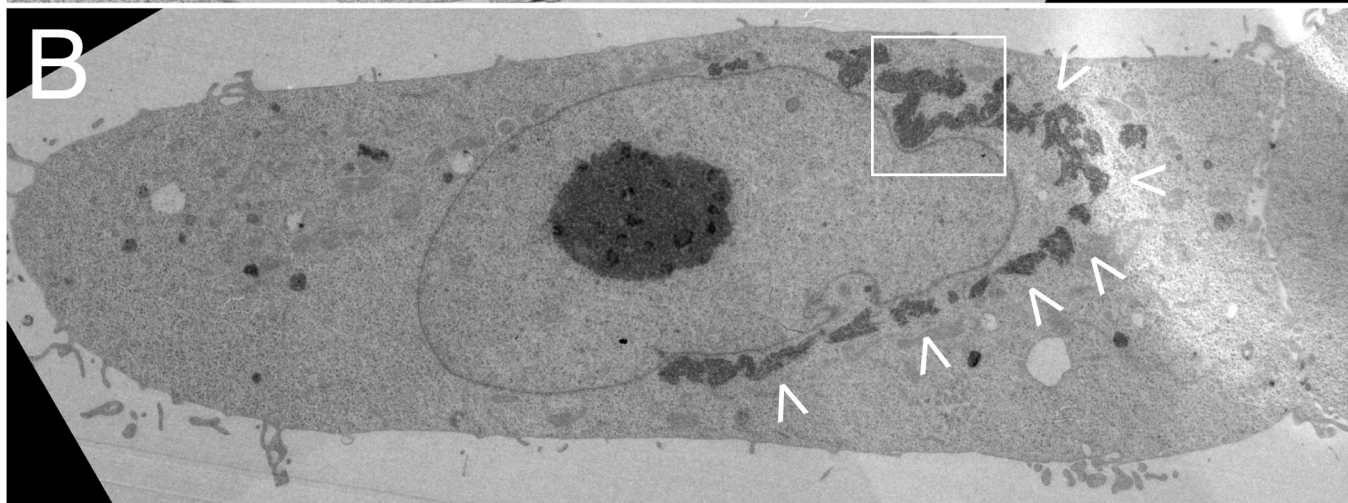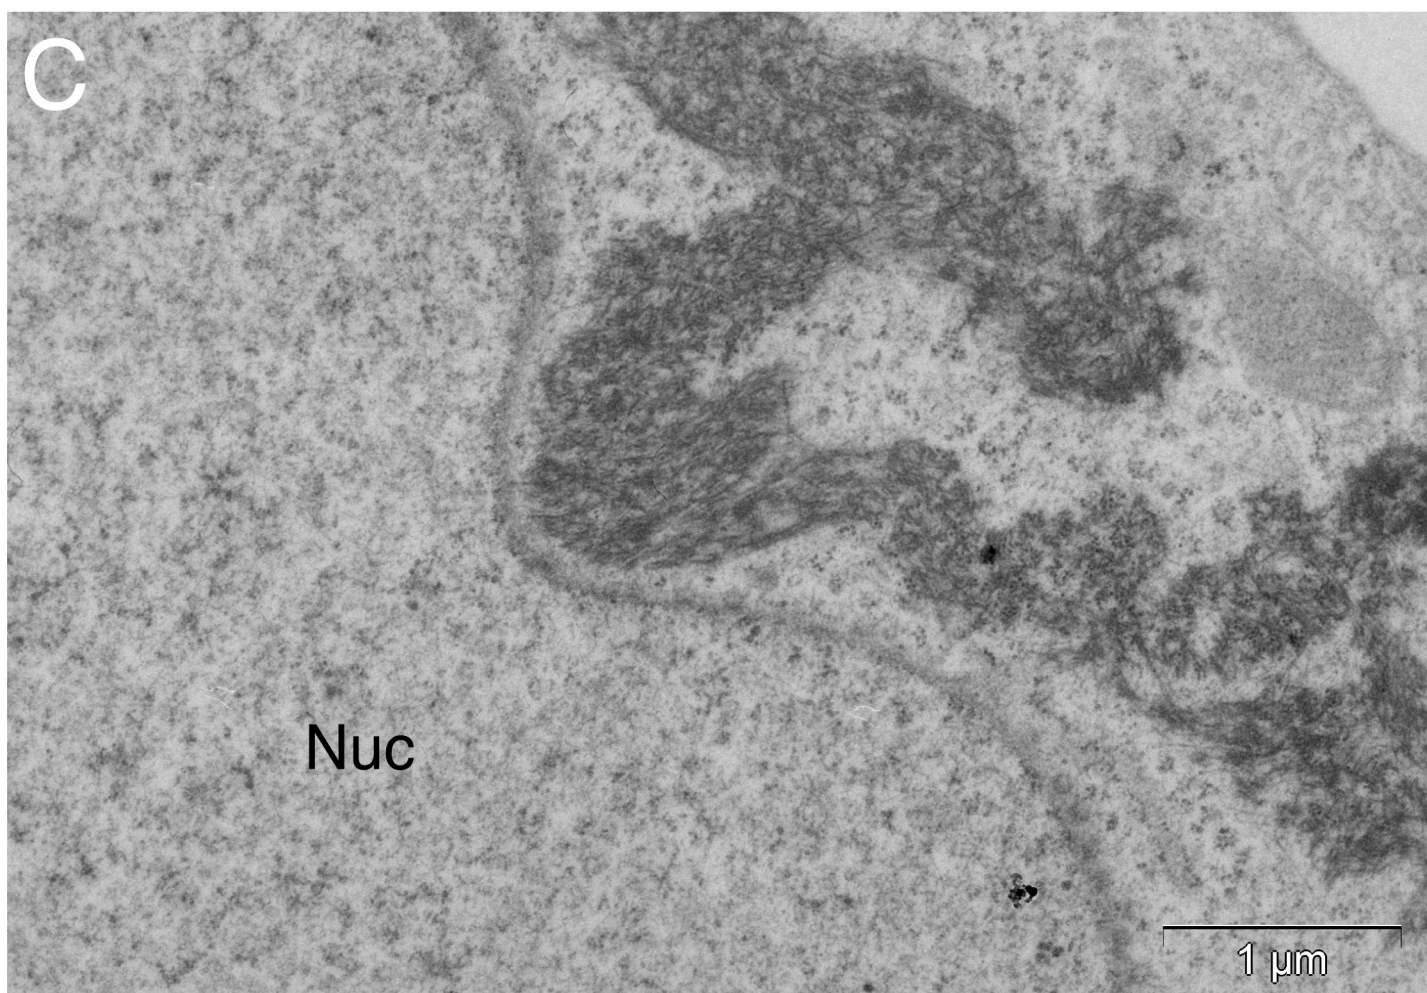

Figure S1

Figure S2

A

| Protein name                                    | Accession number | Score   | Sequence Coverage (%) | No of Peptide matched | Amino-acid number | MW [kDa] |
|-------------------------------------------------|------------------|---------|-----------------------|-----------------------|-------------------|----------|
| Endophilin B2 OS=Homo sapiens GN=SH3GLB2        | Q9NR46           | 892.01  | 70.13                 | 29                    | 395               | 43.94    |
| Plectin 1 OS=Homo sapiens GN=PLEC1              | Q15149           | 1673.73 | 21.84                 | 81                    | 4684              | 531.46   |
| Vimentin OS=Homo sapiens GN=VIM                 | P08670           | 376.49  | 52.36                 | 23                    | 466               | 53.619   |
| Ataxin-2-like protein OS=Homo sapiens GN=ATXN2L | Q8WWM7           | 215.49  | 19.07                 | 16                    | 1075              | 113.3    |
| Endophilin B1 OS=Homo sapiens GN=SH3GLB1        | Q9Y371           | 89.53   | 27.95                 | 7                     | 365               | 40.77    |

B

|       |    |          |            |                                                              |                                                     |     |
|-------|----|----------|------------|--------------------------------------------------------------|-----------------------------------------------------|-----|
| SP    | sp | Q15149   | PLEC_HUMAN | MVAGMLMPR                                                    | DQLRAIYEVLFREGVMVAKKDRRPRSLHHPVPGVTNLQVMRAMASLRARGL | 60  |
| SP    | sp | Q15149-2 | PLEC_HUMAN | -----                                                        | -----                                               |     |
| SP    | sp | Q15149-3 | PLEC_HUMAN | -----                                                        | -----                                               |     |
| SP    | sp | Q15149-4 | PLEC_HUMAN | -----                                                        | -----                                               |     |
| SP    | sp | Q15149-5 | PLEC_HUMAN | -----                                                        | -----                                               |     |
| SP    | sp | Q15149-6 | PLEC_HUMAN | -----                                                        | -----                                               |     |
| SP    | sp | Q15149-7 | PLEC_HUMAN | -----                                                        | -----                                               |     |
| SP    | sp | Q15149-8 | PLEC_HUMAN | -----                                                        | -----                                               |     |
| SP    | sp | Q15149-9 | PLEC_HUMAN | -----                                                        | -----                                               |     |
| SP    | sp | Q15149   | PLEC_HUMAN | VRETFAWCHFYWYLTNEGIAHLRQYLHLPPEIVPASLQVRVRPVAMVMPARRTPHVQA-- | 118                                                 |     |
| SP    | sp | Q15149-2 | PLEC_HUMAN | -----MSG-EDA-EVRAVS                                          | 12                                                  |     |
| SP    | sp | Q15149-3 | PLEC_HUMAN | -----MSG-EDA-EVRAVS                                          | 12                                                  |     |
| SP    | sp | Q15149-4 | PLEC_HUMAN | -----                                                        |                                                     |     |
| SP    | sp | Q15149-5 | PLEC_HUMAN | -----                                                        |                                                     |     |
| SP    | sp | Q15149-6 | PLEC_HUMAN | -----MSG-A-----                                              | 4                                                   |     |
| SP    | sp | Q15149-7 | PLEC_HUMAN | -----                                                        |                                                     |     |
| SP    | sp | Q15149-8 | PLEC_HUMAN | -----                                                        |                                                     |     |
| SP    | sp | Q15149-9 | PLEC_HUMAN | -----                                                        |                                                     |     |
| SP    | sp | Q15149   | PLEC_HUMAN | ---VQGPLGSPPK                                                | RGPLPTEQRVYRKELEEVS--PETPVVPATTQRTLARPGPEPAPAT      | 174 |
| SP    | sp | Q15149-2 | PLEC_HUMAN | EDVSNNGSSGSPSPGDTLPWNLTKTQSRSSGGGAGSNGSVLDP----              | A---ERAVIRIA                                        | 64  |
| SP    | sp | Q15149-3 | PLEC_HUMAN | EDVSNNGSSGSPSPGDTLPWNLTKTQSRSSGGGAGSNGSVLDP----              | A---ERAVIRIA                                        | 64  |
| SP    | sp | Q15149-4 | PLEC_HUMAN | ---MSHQQLRVVQ-----PEGLGR-----                                | KRTSSEDNL-----YLAVLRASEGKK                          | 37  |
| SP    | sp | Q15149-5 | PLEC_HUMAN | -----MEPSGSLFPPSLVV-----                                     | VGHVVTAAV-WH-----WRRGRRWAQDEQ                       | 37  |
| SP    | sp | Q15149-6 | PLEC_HUMAN | -----GGAFASPREVL-----L-ERPCLWDGGCE-----                      | PA-----RRGYLYQQLCCV                                 | 41  |
| SP    | sp | Q15149-7 | PLEC_HUMAN | -----                                                        | MKIIVP                                              | 5   |
| SP    | sp | Q15149-8 | PLEC_HUMAN | -----                                                        | MDP-----SRATQNETSSLK                                | 15  |
| SP    | sp | Q15149-9 | PLEC_HUMAN | -----                                                        | MAGPLPDEQDF-----IQAYEEVREKYK                        | 23  |
| SP    | sp | Q15149   | PLEC_HUMAN | DERDRVQKKTFTKWNKHLIKAQRHISDLYEDLRDGHNLISLLEVLSGDGLPREKGRMR   | 234                                                 |     |
| SP    | sp | Q15149-2 | PLEC_HUMAN | DERDRVQKKTFTKWNKHLIKAQRHISDLYEDLRDGHNLISLLEVLSGDGLPREKGRMR   | 124                                                 |     |
| SP    | sp | Q15149-3 | PLEC_HUMAN | DERDRVQKKTFTKWNKHLIKAQRHISDLYEDLRDGHNLISLLEVLSGDGLPREKGRMR   | 124                                                 |     |
| SP    | sp | Q15149-4 | PLEC_HUMAN | DERDRVQKKTFTKWNKHLIKAQRHISDLYEDLRDGHNLISLLEVLSGDGLPREKGRMR   | 97                                                  |     |
| SP    | sp | Q15149-5 | PLEC_HUMAN | DERDRVQKKTFTKWNKHLIKAQRHISDLYEDLRDGHNLISLLEVLSGDGLPREKGRMR   | 97                                                  |     |
| SP    | sp | Q15149-6 | PLEC_HUMAN | DERDRVQKKTFTKWNKHLIKAQRHISDLYEDLRDGHNLISLLEVLSGDGLPREKGRMR   | 101                                                 |     |
| SP    | sp | Q15149-7 | PLEC_HUMAN | DERDRVQKKTFTKWNKHLIKAQRHISDLYEDLRDGHNLISLLEVLSGDGLPREKGRMR   | 65                                                  |     |
| SP    | sp | Q15149-8 | PLEC_HUMAN | DERDRVQKKTFTKWNKHLIKAQRHISDLYEDLRDGHNLISLLEVLSGDGLPREKGRMR   | 75                                                  |     |
| SP    | sp | Q15149-9 | PLEC_HUMAN | DERDRVQKKTFTKWNKHLIKAQRHISDLYEDLRDGHNLISLLEVLSGDGLPREKGRMR   | 83                                                  |     |
| ***** |    |          |            |                                                              |                                                     |     |
| SP    | sp | Q15149   | PLEC_HUMAN | HKLQNVQIALDYLRHRQVKLVNIRNDDIADGNPKLTGLGIWTIILHFQISDIQVSGQSED | 294                                                 |     |
| SP    | sp | Q15149-2 | PLEC_HUMAN | HKLQNVQIALDYLRHRQVKLVNIRNDDIADGNPKLTGLGIWTIILHFQISDIQVSGQSED | 184                                                 |     |
| SP    | sp | Q15149-3 | PLEC_HUMAN | HKLQNVQIALDYLRHRQVKLVNIRNDDIADGNPKLTGLGIWTIILHFQISDIQVSGQSED | 184                                                 |     |
| SP    | sp | Q15149-4 | PLEC_HUMAN | HKLQNVQIALDYLRHRQVKLVNIRNDDIADGNPKLTGLGIWTIILHFQISDIQVSGQSED | 157                                                 |     |
| SP    | sp | Q15149-5 | PLEC_HUMAN | HKLQNVQIALDYLRHRQVKLVNIRNDDIADGNPKLTGLGIWTIILHFQISDIQVSGQSED | 157                                                 |     |
| SP    | sp | Q15149-6 | PLEC_HUMAN | HKLQNVQIALDYLRHRQVKLVNIRNDDIADGNPKLTGLGIWTIILHFQISDIQVSGQSED | 161                                                 |     |
| SP    | sp | Q15149-7 | PLEC_HUMAN | HKLQNVQIALDYLRHRQVKLVNIRNDDIADGNPKLTGLGIWTIILHFQISDIQVSGQSED | 125                                                 |     |
| SP    | sp | Q15149-8 | PLEC_HUMAN | HKLQNVQIALDYLRHRQVKLVNIRNDDIADGNPKLTGLGIWTIILHFQISDIQVSGQSED | 135                                                 |     |
| SP    | sp | Q15149-9 | PLEC_HUMAN | HKLQNVQIALDYLRHRQVKLVNIRNDDIADGNPKLTGLGIWTIILHFQISDIQVSGQSED | 143                                                 |     |
| ***** |    |          |            |                                                              |                                                     |     |
| SP    | sp | Q15149   | PLEC_HUMAN | MTAKEKLLLSQRMVEGYQGLRCDNFTSSWRDGRLFNAIHRHKPLLDNMKVYRQTNLE    | 354                                                 |     |
| SP    | sp | Q15149-2 | PLEC_HUMAN | MTAKEKLLLSQRMVEGYQGLRCDNFTSSWRDGRLFNAIHRHKPLLDNMKVYRQTNLE    | 244                                                 |     |
| SP    | sp | Q15149-3 | PLEC_HUMAN | MTAKEKLLLSQRMVEGYQGLRCDNFTSSWRDGRLFNAIHRHKPLLDNMKVYRQTNLE    | 244                                                 |     |
| SP    | sp | Q15149-4 | PLEC_HUMAN | MTAKEKLLLSQRMVEGYQGLRCDNFTSSWRDGRLFNAIHRHKPLLDNMKVYRQTNLE    | 217                                                 |     |
| SP    | sp | Q15149-5 | PLEC_HUMAN | MTAKEKLLLSQRMVEGYQGLRCDNFTSSWRDGRLFNAIHRHKPLLDNMKVYRQTNLE    | 217                                                 |     |
| SP    | sp | Q15149-6 | PLEC_HUMAN | MTAKEKLLLSQRMVEGYQGLRCDNFTSSWRDGRLFNAIHRHKPLLDNMKVYRQTNLE    | 221                                                 |     |
| SP    | sp | Q15149-7 | PLEC_HUMAN | MTAKEKLLLSQRMVEGYQGLRCDNFTSSWRDGRLFNAIHRHKPLLDNMKVYRQTNLE    | 185                                                 |     |
| SP    | sp | Q15149-8 | PLEC_HUMAN | MTAKEKLLLSQRMVEGYQGLRCDNFTSSWRDGRLFNAIHRHKPLLDNMKVYRQTNLE    | 195                                                 |     |
| SP    | sp | Q15149-9 | PLEC_HUMAN | MTAKEKLLLSQRMVEGYQGLRCDNFTSSWRDGRLFNAIHRHKPLLDNMKVYRQTNLE    | 203                                                 |     |
| ***** |    |          |            |                                                              |                                                     |     |
| SP    | sp | Q15149   | PLEC_HUMAN | NLDQAFSVAERDLGVTRLLDPEDVDVPPQPEKSIITYVSSLYDAMPVDPVQDGVRA     | 414                                                 |     |
| SP    | sp | Q15149-2 | PLEC_HUMAN | NLDQAFSVAERDLGVTRLLDPEDVDVPPQPEKSIITYVSSLYDAMPVDPVQDGVRA     | 304                                                 |     |
| SP    | sp | Q15149-3 | PLEC_HUMAN | NLDQAFSVAERDLGVTRLLDPEDVDVPPQPEKSIITYVSSLYDAMPVDPVQDGVRA     | 300                                                 |     |
| SP    | sp | Q15149-4 | PLEC_HUMAN | NLDQAFSVAERDLGVTRLLDPEDVDVPPQPEKSIITYVSSLYDAMPVDPVQDGVRA     | 277                                                 |     |
| SP    | sp | Q15149-5 | PLEC_HUMAN | NLDQAFSVAERDLGVTRLLDPEDVDVPPQPEKSIITYVSSLYDAMPVDPVQDGVRA     | 277                                                 |     |
| SP    | sp | Q15149-6 | PLEC_HUMAN | NLDQAFSVAERDLGVTRLLDPEDVDVPPQPEKSIITYVSSLYDAMPVDPVQDGVRA     | 281                                                 |     |
| SP    | sp | Q15149-7 | PLEC_HUMAN | NLDQAFSVAERDLGVTRLLDPEDVDVPPQPEKSIITYVSSLYDAMPVDPVQDGVRA     | 245                                                 |     |
| SP    | sp | Q15149-8 | PLEC_HUMAN | NLDQAFSVAERDLGVTRLLDPEDVDVPPQPEKSIITYVSSLYDAMPVDPVQDGVRA     | 255                                                 |     |
| SP    | sp | Q15149-9 | PLEC_HUMAN | NLDQAFSVAERDLGVTRLLDPEDVDVPPQPEKSIITYVSSLYDAMPVDPVQDGVRA     | 263                                                 |     |
| ***** |    |          |            |                                                              |                                                     |     |

anti-plectin

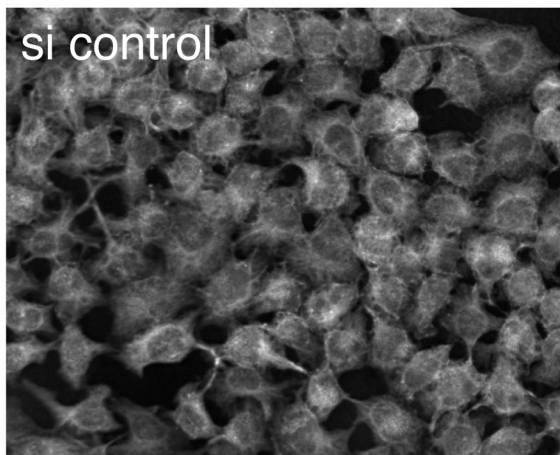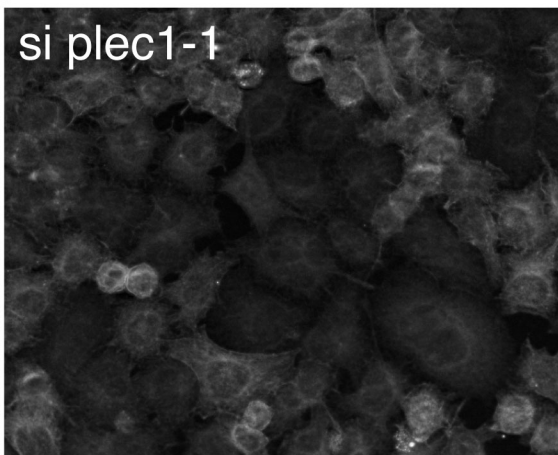

anti-vimentin

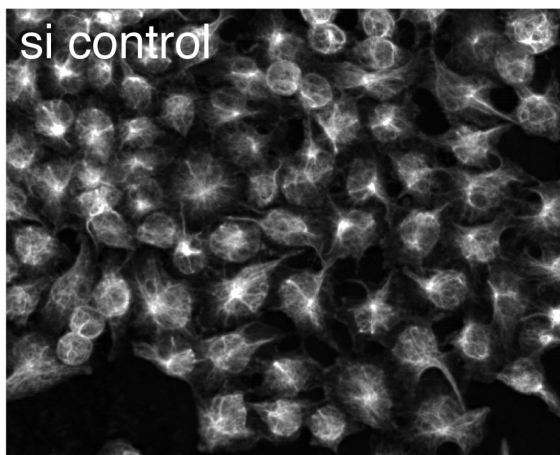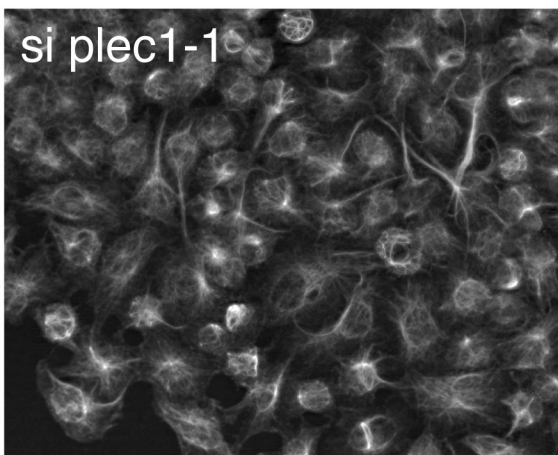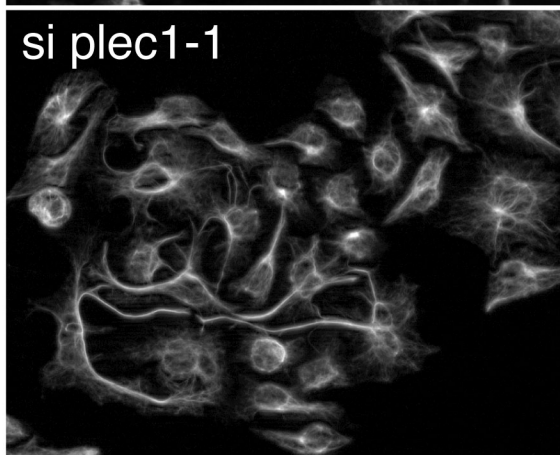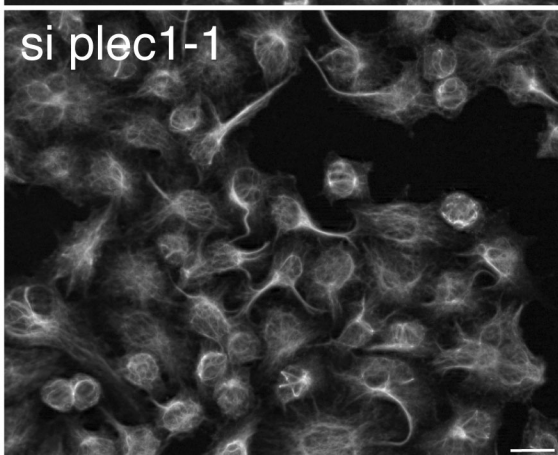

Figure S3
